# Supplementary material for: Highly efficient three-component coupling reaction catalysed by atomically precise ligand-protected Au38(SC2H4Ph)24 nanoclusters
Source: Royal Society of Chemistry journal article supplement (doi:10.1039/c6cc07825g), 2016-01-01
Supplement: c6cc07825g1.pdf [file c6cc07825g1.pdf]

## Supporting Information

### Highly Efficient Three-Component Coupling Reaction Catalyzed by Atomically Precise Ligand-Protected Au<sub>38</sub> Nanoclusters

Qi Li<sup>a</sup>, Anindita Das<sup>a‡</sup>, Shuxin, Wang<sup>a</sup>, Yuxiang, Chen<sup>a</sup>, Rongchao Jin<sup>a\*</sup>

<sup>a</sup>Department of Chemistry, Carnegie Mellon University, Pittsburgh, PA 15213, USA.

#### Experimental

*Synthesis of Au<sub>38</sub>(SC<sub>2</sub>H<sub>4</sub>Ph)<sub>24</sub> and Au<sub>25</sub>(SC<sub>2</sub>H<sub>4</sub>Ph)<sub>18</sub> Nanoclusters.* The syntheses of Au<sub>38</sub>(SC<sub>2</sub>H<sub>4</sub>Ph)<sub>24</sub> and Au<sub>25</sub>(SC<sub>2</sub>H<sub>4</sub>Ph)<sub>18</sub> nanoclusters followed the previously reported methods.<sup>1,2</sup>

*Preparation of the Au(I)-S-C<sub>2</sub>H<sub>4</sub>Ph catalyst.* 1 mL solution of 200 mg HAuCl<sub>4</sub> was mixed with another methanol solution (7 mL) containing PhC<sub>2</sub>H<sub>4</sub>SH (0.3 mL) under vigorous stirring for 30 min. After centrifugation at ~6500 rpm, the solution was then removed and the precipitate was washed several times with ethanol/water to remove the redundant PhC<sub>2</sub>H<sub>4</sub>SH. The Au(I)-S-C<sub>2</sub>H<sub>4</sub>Ph was obtained.

*Preparation of the supported Au<sub>38</sub>(SR)<sub>24</sub>/oxide catalyst.* To prepare the oxide-supported catalyst, 1 mg of Au<sub>38</sub>(SR)<sub>24</sub> was dissolved in 5 ml CH<sub>2</sub>Cl<sub>2</sub>, and 100 mg CeO<sub>2</sub>/TiO<sub>2</sub>/SiO<sub>2</sub> was added. After stirring for 12 h at r.t., the clusters were adsorbed onto the oxide surfaces. The Au<sub>38</sub>(SR)<sub>24</sub>/oxide-support catalysts were collected by centrifugation and dried in vacuum.

*Catalytic reaction.* Typically, 1 equiv of benzaldehyde (1mmol), 1.2 equiv of piperidine and 1.3 equiv of phenylacetylene were added to a 10 mL round-bottom flask containing ~1 mg of the Au<sub>38</sub>(SC<sub>2</sub>H<sub>4</sub>Ph)<sub>24</sub> cluster (0.1 μmol). 1 ml solvent (e.g., water, toluene) was added into the flask if needed. This reaction mixture was then stirred at 80 °C for 6 h. The products of this catalytic reaction were analyzed by NMR spectroscopy.

[1] H. Qian, Y. Zhu and R. Jin, *ACS Nano*, 2009, **3**, 3795

[2] Z. Wu, J. Suhan and R. Jin, *J. Mater. Chem.*, 2009, **19**, 622.

#### Supporting Figures

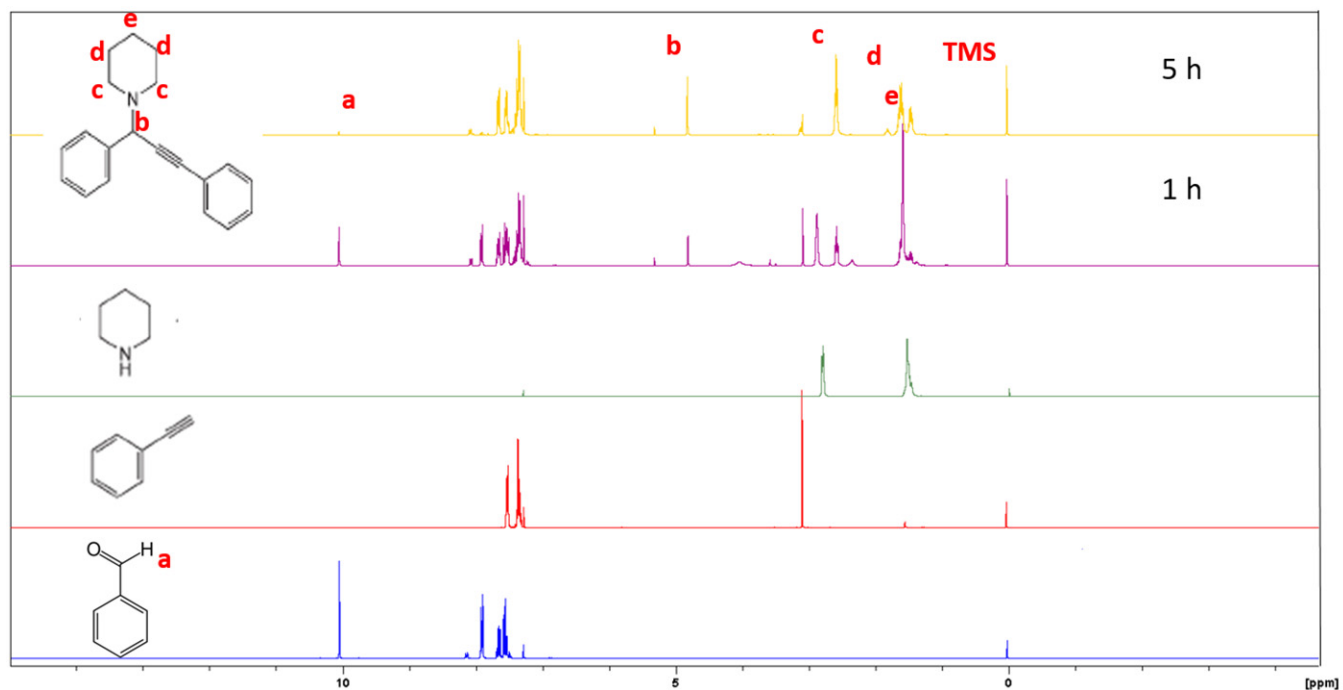

**Figure S1.** NMR spectra of benzaldehyde, phenylacetylene, piperidine, and the reaction mixture (after 1 h and 5 h, respectively). The NMR peaks of various H's are as indicated in the figure.

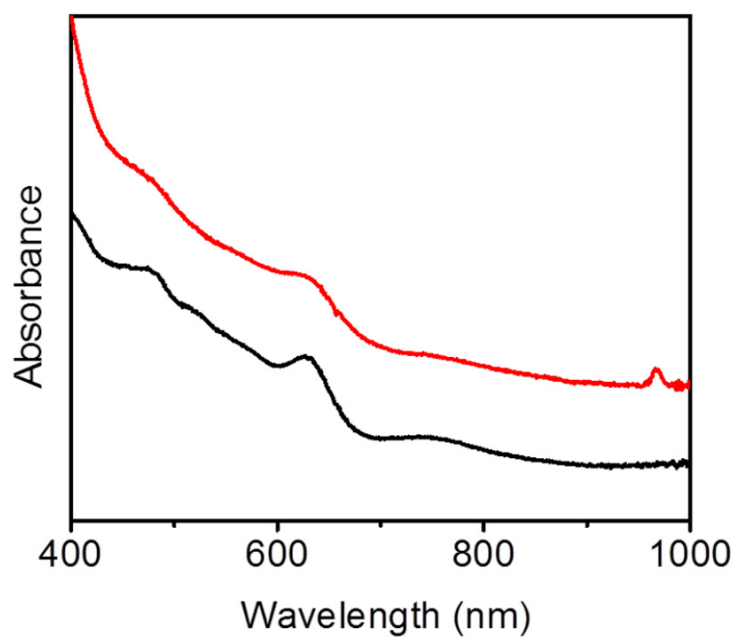

**Figure S2.** UV-Vis spectra of the  $\text{Au}_{38}(\text{SC}_2\text{H}_4\text{Ph})_{24}$  catalyst before (black curve) and after the A<sup>3</sup>-coupling reaction (red curve).

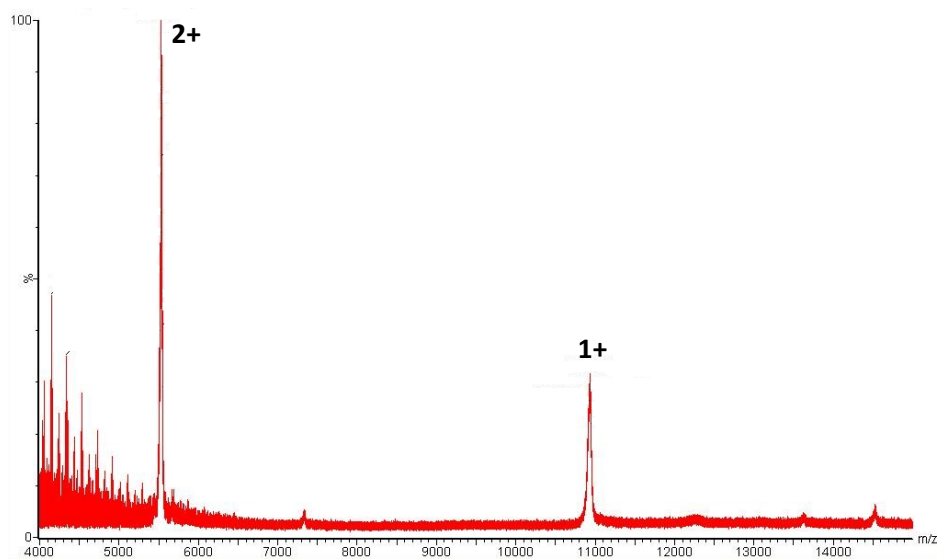

**Figure S3.** ESI-Mass spectrum of  $\text{Au}_{38}(\text{SC}_2\text{H}_4\text{Ph})_{24}$  after the A3-coupling reaction. Cesium acetate ( $\text{CsOAc}$ ) was added to form adducts with the charge neutral clusters. The low-mass, comb-like peaks ( $m/z < 5300$ ) are from  $[(\text{CsOAc})_n\text{Cs}]^+$  with spacing of one  $\text{CsOAc}$ .

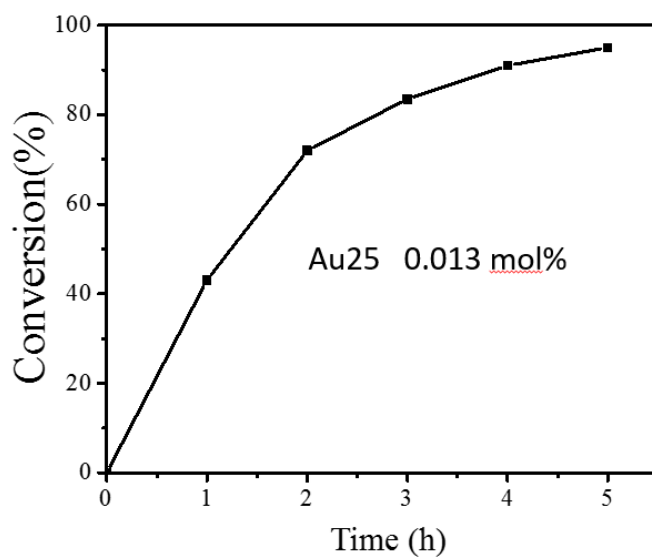

**Figure S4.** Conversion of benzaldehyde, phenylacetylene and piperidine as a function of reaction time over the  $\text{Au}_{25}(\text{SC}_2\text{H}_4\text{Ph})_{18}^-$  catalyst.
